# Supplementary material for: Computational discovery of In2XY2 (X, Y = S, Se, and Te; X ≠ Y) monolayers as multifunctional energy conversion materials
Source: Royal Society of Chemistry journal article supplement (doi:10.1039/d2tc02084j), 2022-01-01
Supplement: d2tc02084j1.pdf [file d2tc02084j1.pdf]

Supporting Information for

**Computational discovery of  $\text{In}_2\text{XY}_2$  (X, Y= S, Se and Te; X  $\neq$  Y) monolayers as multifunctional energy conversion materials**

Rui Xiong<sup>1</sup>, Weiqiang Li<sup>1</sup>, Yinggan Zhang<sup>2</sup>, Zhou Cui<sup>1</sup>, Cuilian Wen<sup>1</sup>, Masakazu Anpo<sup>3</sup>, Bo Wu<sup>1</sup>, and Baisheng Sa<sup>1,\*</sup>

<sup>1</sup>*Key Laboratory of Eco-materials Advanced Technology, College of Materials Science and Engineering, Fuzhou University, Fuzhou 350108, P. R. China*

<sup>2</sup>*College of Materials, Fujian Provincial Key Laboratory of Theoretical and Computational Chemistry, Xiamen University, Xiamen 361005, P. R. China*

<sup>3</sup>*State Key Laboratory of Photocatalysis on Energy and Environment, Fuzhou University, Fuzhou 350116, P. R. China*

Corresponding Author: \*bssa@fzu.edu.cn (B. Sa)

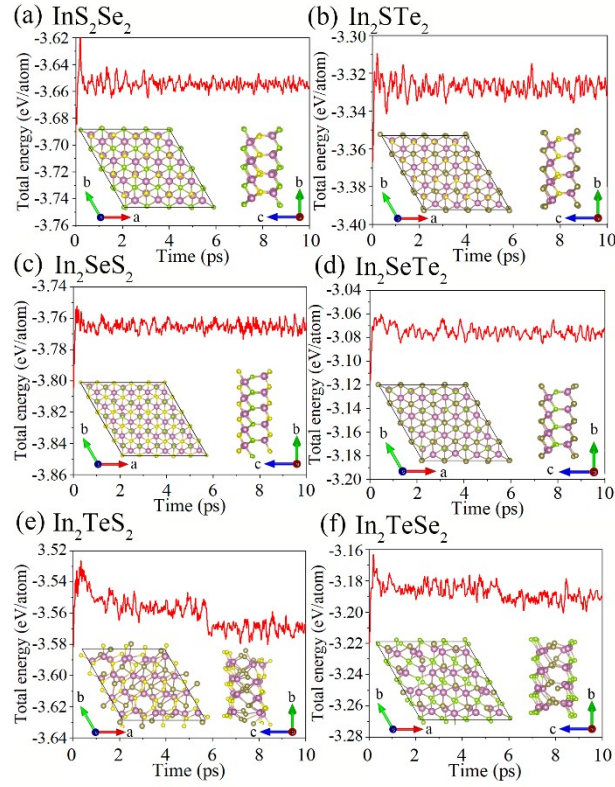

Figure S1. The evolution of total energy and snapshot structure from AIMD simulations of (a)  $\text{In}_2\text{S}_2\text{Se}_2$ , (b)  $\text{In}_2\text{STe}_2$ , (c)  $\text{In}_2\text{SeS}_2$ , (d)  $\text{In}_2\text{SeTe}_2$ , (e)  $\text{In}_2\text{TeS}_2$ , (f)  $\text{In}_2\text{TeSe}_2$  for 10 ps at 300 K.

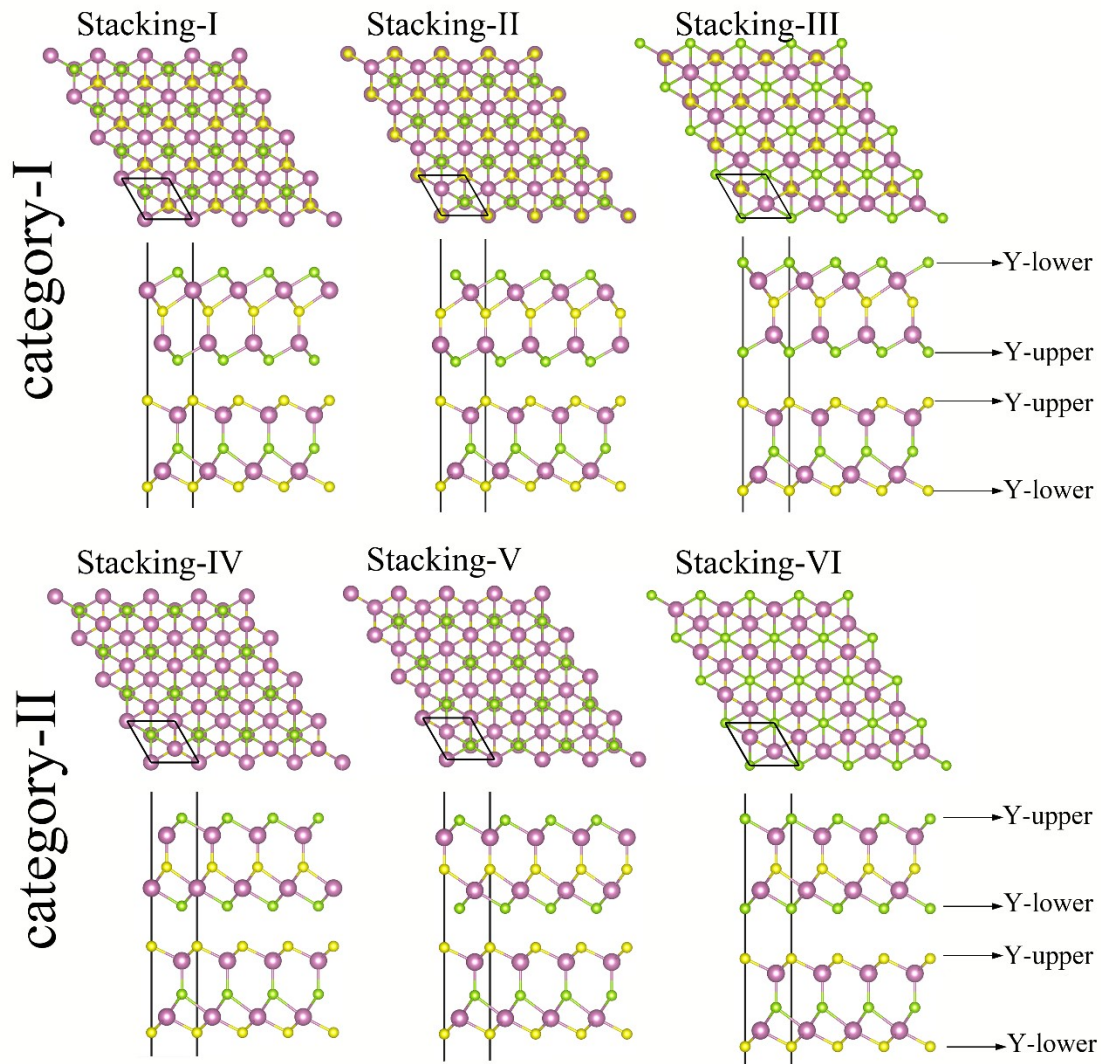

Figure S2. The six stacking configurations of  $\text{In}_2\text{SSe}_2/\text{In}_2\text{SeS}_2$  and  $\text{In}_2\text{STe}_2/\text{In}_2\text{SeTe}_2$  heterostructures.

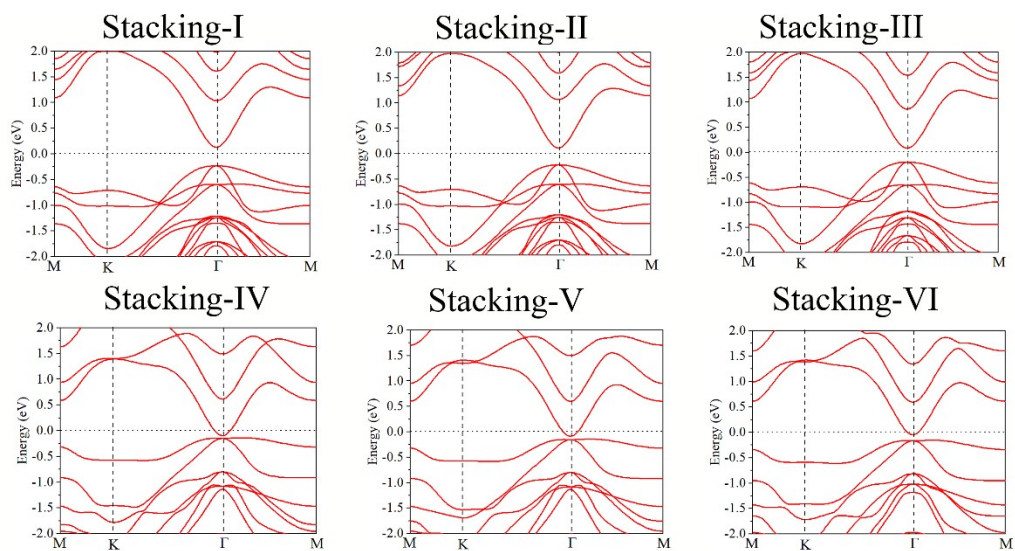

Figure S3. The band structures of  $\text{In}_2\text{SSe}_2/\text{In}_2\text{SeS}_2$  heterostructure with different stacking configurations using PBE functional.

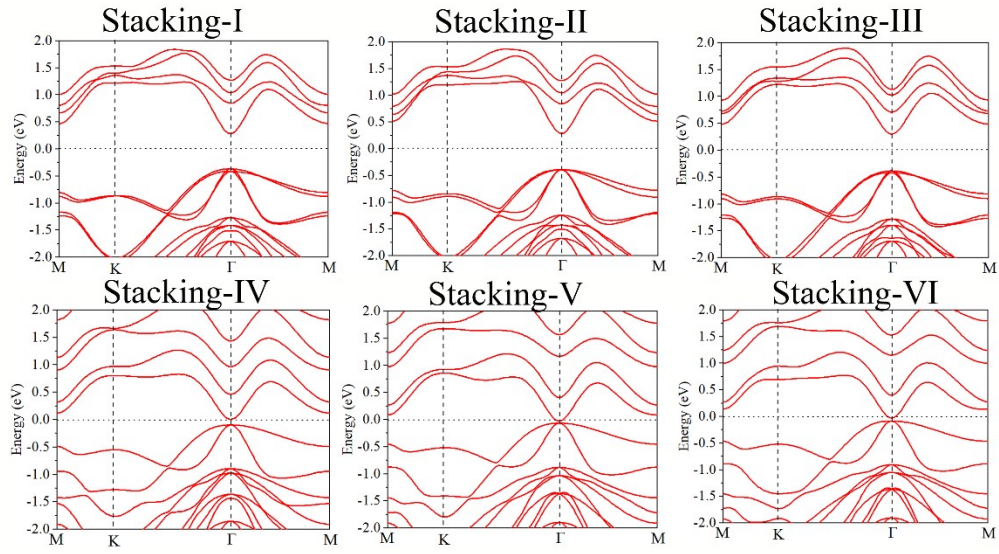

Figure S4. The band structures of  $\text{In}_2\text{STe}_2/\text{In}_2\text{SeTe}_2$  heterostructure with different stacking configurations using PBE functional.

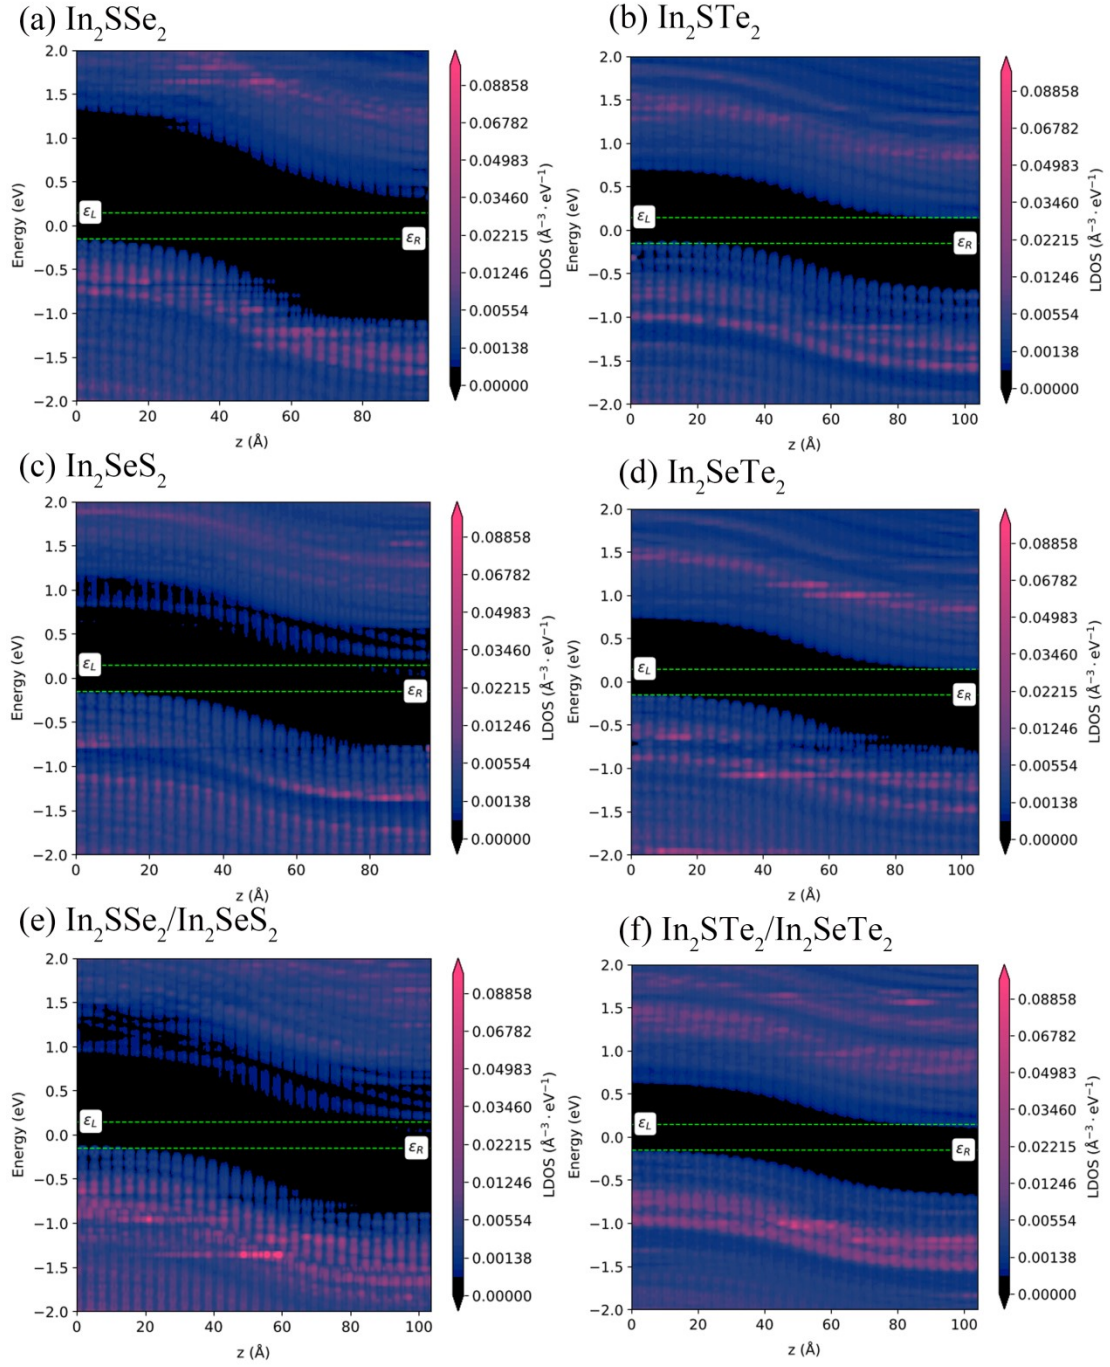

Figure S5 The local density of states (LDOS) of solar cell devices (a)  $\text{In}_2\text{SSe}_2$ , (b)  $\text{In}_2\text{STe}_2$ , (c)  $\text{In}_2\text{SeS}_2$ , (d)  $\text{In}_2\text{SeTe}_2$ , (e)  $\text{In}_2\text{SSe}_2/\text{In}_2\text{SeS}_2$  and (f)  $\text{In}_2\text{STe}_2/\text{In}_2\text{SeTe}_2$ .

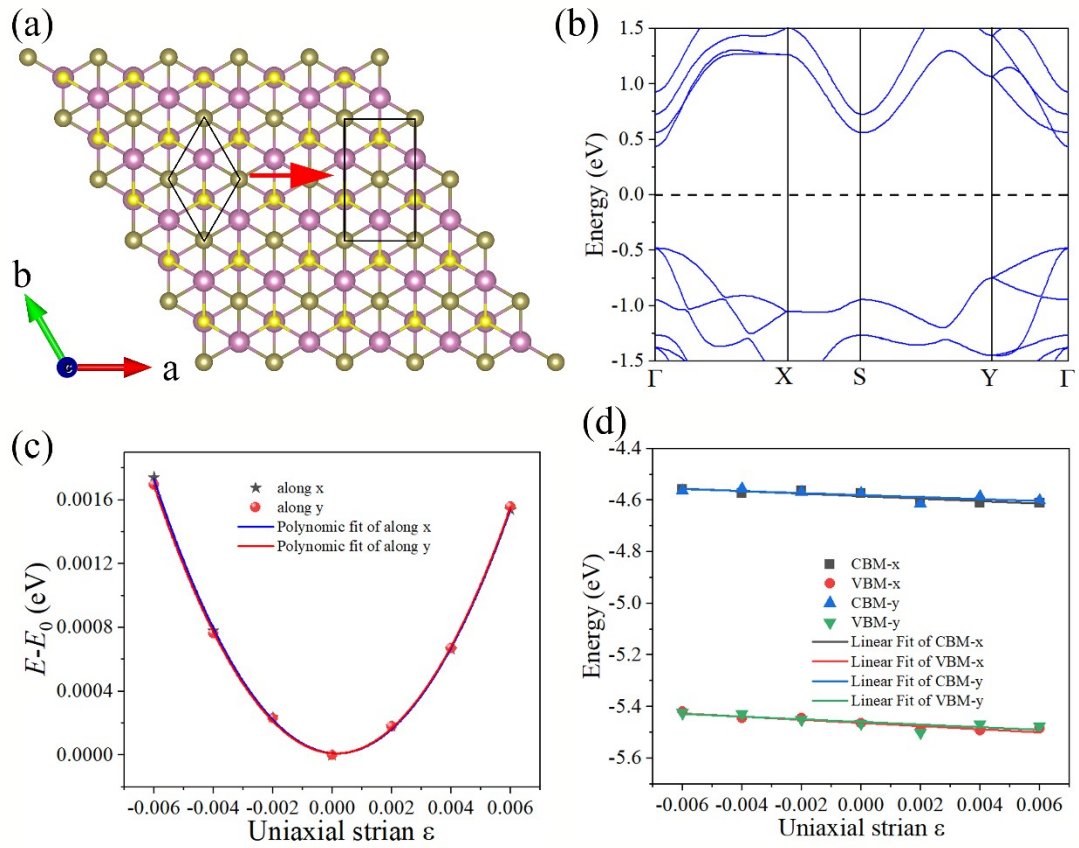

Figure. S6. (a) In<sub>2</sub>STe<sub>2</sub> monolayer in an orthorhombic lattice instead of a hexagonal lattice. (b) Band structure, (c) total energy shift ( $E - E_0$ ) and (d) band edge positions of In<sub>2</sub>STe<sub>2</sub> monolayer as a function of the uniaxial strain  $\epsilon$  along both the zigzag ( $x$ ) and armchair ( $y$ ) directions by PBE. The vacuum level is set to 0 for reference in (d).

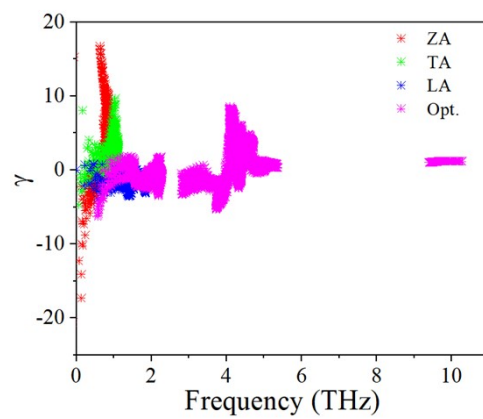

Figure S7. The calculated Grüneisen parameter  $\gamma$  as a function of phonon frequency for  $\text{In}_2\text{STe}_2$  monolayer.



Table S1. The bonding length of  $\text{In}_2\text{XY}_2$  and  $\text{In}_2\text{X}_3$  monolayers

|                            | $L_{\text{In1-X}} (\text{\AA})$ | $L_{\text{In2-X}} (\text{\AA})$ | $L_{\text{In1-Y-upper}} (\text{\AA})$ | $L_{\text{In2-Y-lower}} (\text{\AA})$ |
|----------------------------|---------------------------------|---------------------------------|---------------------------------------|---------------------------------------|
| $\text{In}_2\text{SSe}_2$  | 2.83                            | 2.42                            | 2.69                                  | 2.66                                  |
| $\text{In}_2\text{STe}_2$  | 2.91                            | 2.42                            | 2.89                                  | 2.85                                  |
| $\text{In}_2\text{SeS}_2$  | 2.87                            | 2.54                            | 2.59                                  | 2.55                                  |
| $\text{In}_2\text{SeTe}_2$ | 2.98                            | 2.56                            | 2.91                                  | 2.87                                  |
| $\text{In}_2\text{TeS}_2$  | 3.04                            | 2.76                            | 2.61                                  | 2.57                                  |
| $\text{In}_2\text{TeSe}_2$ | 3.06                            | 2.75                            | 2.74                                  | 2.70                                  |
| $\text{In}_2\text{S}_3$    | 2.79                            | 2.41                            | 2.57                                  | 2.41                                  |
| $\text{In}_2\text{Se}_3$   | 2.91                            | 2.55                            | 2.71                                  | 2.68                                  |
| $\text{In}_2\text{Te}_3$   | 3.11                            | 2.76                            | 2.94                                  | 2.88                                  |

Table S2. Calculated Effective Mass ( $m^*$ ), Elastic Modulid ( $C_{2D}$ ), Deformation Potentials ( $E_1$ ), and Carrier Mobility ( $\mu$ ) of  $\text{In}_2\text{XY}_2$  monolayer along  $x$  and  $y$  directions

| Direction | Carrier | $E_1$ (eV) | $C_{2D}$              | $m^*/m_0$ | $\mu(\text{cm}^2 \text{V}^{-1} \text{s}^{-1})$ | $t(\text{ps})$ |
|-----------|---------|------------|-----------------------|-----------|------------------------------------------------|----------------|
|           | type    |            | ( $\text{N m}^{-1}$ ) |           |                                                |                |
| x         | e       | 4.860      | 45.7                  | 0.17      | 941.10                                         | 0.10           |
|           | h       | 6.110      | 45.7                  | 1.61      | 6.60                                           | 0.01           |
| y         | e       | 3.910      | 45.4                  | 0.17      | 1377.70                                        | 0.15           |
|           | h       | 5.110      | 45.4                  | 1.75      | 8.00                                           | 0.01           |
